# Supplementary material for: An Explanation about the Use of (S)-Citronellal as a Chiral Derivatizing Agent (CDA) in 1H and 13C NMR for Sec-Butylamine, Methylbenzylamine, and Amphetamine: A Theoretical-Experimental Study
Source: MDPI journal article supplement (doi:10.3390/molecules24152830), 2019-08-03
Supplement: s1 [file s1]

## Supplementary Information

An explanation about the use of (*S*)-citronelal as chiral derivatizing agent (CDA) in  $^1\text{H}$  and  $^{13}\text{C}$  NMR for *sec*-butylamine, methylbenzylamine, and amphetamine: a theoretical-experimental study

*Viviani Nardini\**, *Vinicius Palaretti*, *Luis Gustavo Dias* and *Gil Valdo José da Silva*

*Departamento de Química, Faculdade de Filosofia, Ciências e Letras de Ribeirão Preto, Universidade de São Paulo, Avenida dos Bandeirantes, 3900, 14040-901 Ribeirão Preto, SP, Brazil, Tel.: +55-16-3315-4382; fax: +55-16-3633-8151*

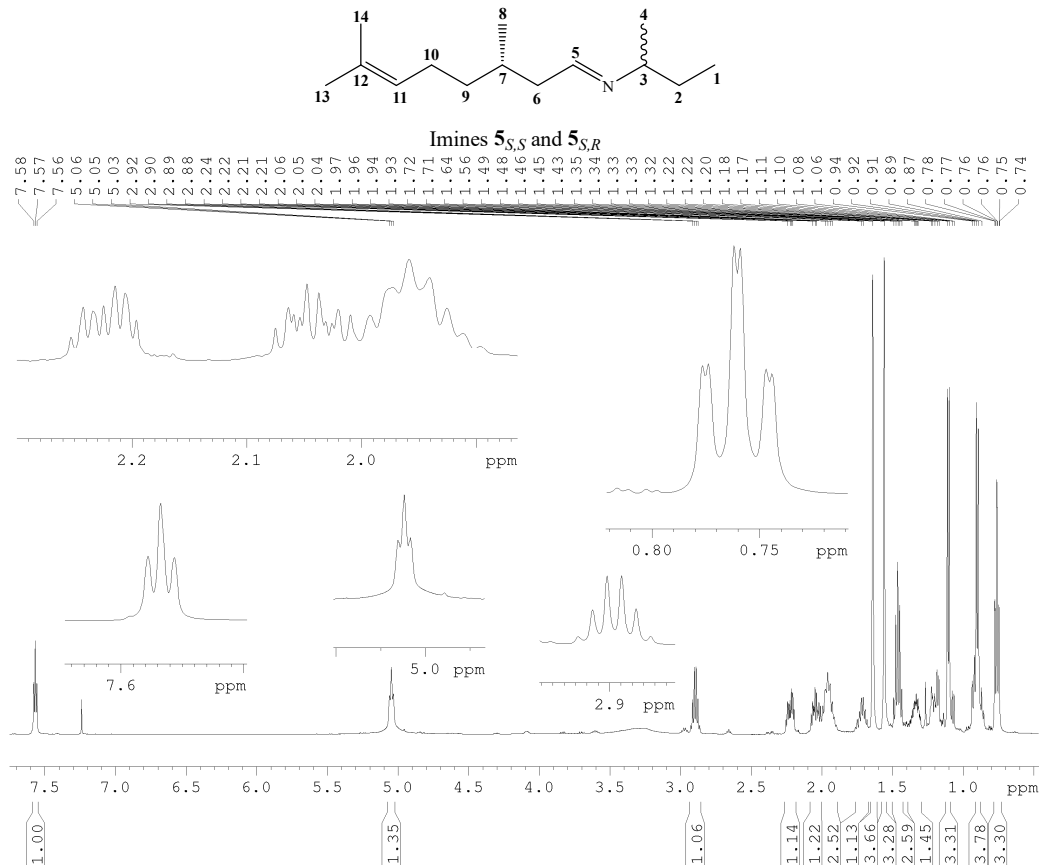

**Figure S1.**  $^1\text{H}$  NMR spectrum of the *S,S* and *S,R* diastereoisomers derived from the reaction between (*S*)-citronellal and the racemic mixture of *sec*-butylamine (imines **5<sub>S,S</sub>** and **5<sub>S,R</sub>**,  $\text{CDCl}_3$ , 500 MHz).

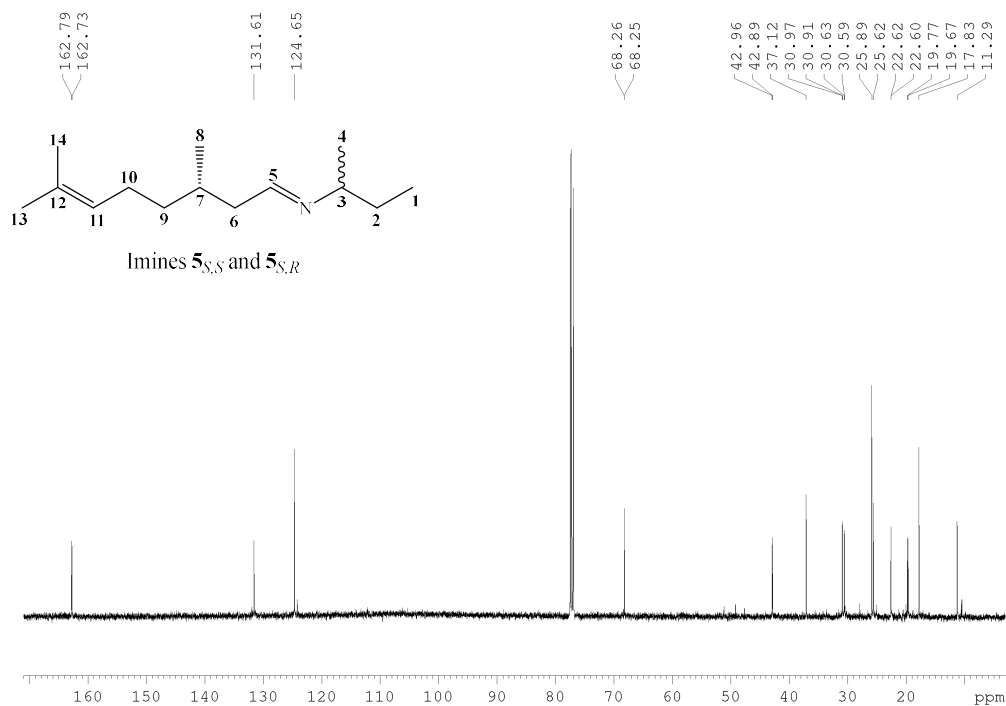

**Figure S2.**  $^{13}\text{C}$  NMR spectrum of the *S,S* and *S,R* diastereoisomers derived from the reaction between (*S*)-citronellal and the racemic mixture of *sec*-butylamine (imines **5<sub>S,S</sub>** and **5<sub>S,R</sub>**,  $\text{CDCl}_3$ , 500 MHz).

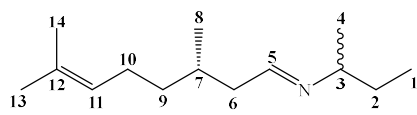Imines  $5_{S,S}$  and  $5_{S,R}$ 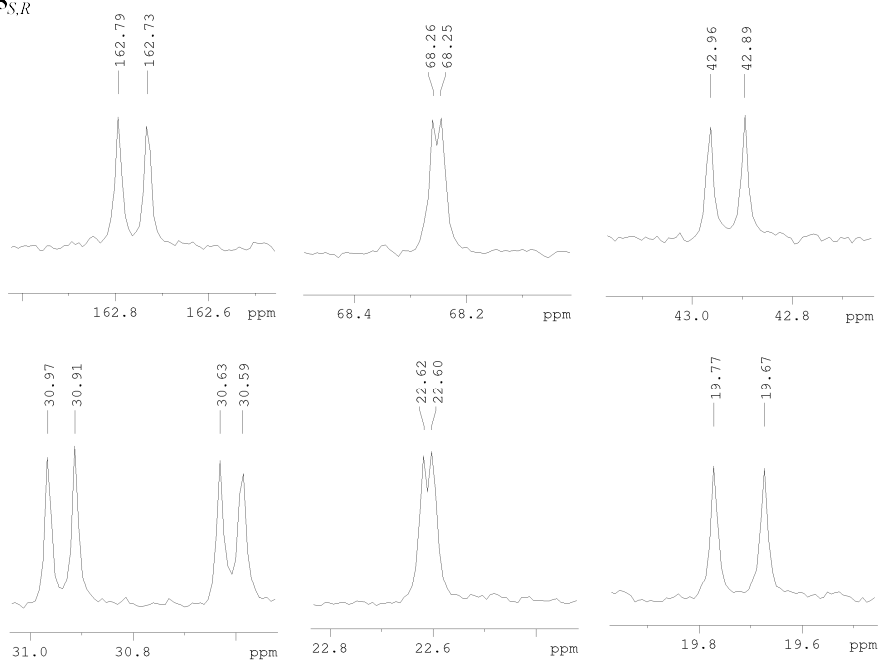

**Figure S3.** Expansion of  $^{13}\text{C}$  NMR spectrum of the  $S,S$  and  $S,R$  diastereoisomers derived from the reaction between (*S*)-citronellal and the racemic mixture of *sec*-butylamine (imines  $5_{S,S}$  and  $5_{S,R}$ ,  $\text{CDCl}_3$ , 500 MHz).

**Table S1.** Spectroscopic data of the *S,S* and *S,R* diastereoisomers derived from the reaction between (*S*)-citronellal and the racemic mixture of *sec*-butylamine (imines **5<sub>S,S</sub>** and **5<sub>S,R</sub>**, CDCl<sub>3</sub>, 500 MHz).

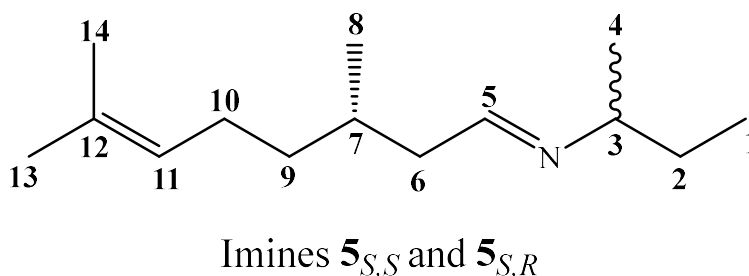

| Number | $\delta$ (ppm) | Multiplicity        | $J$ (Hz) | $\delta_c$ (ppm)                                |
|--------|----------------|---------------------|----------|-------------------------------------------------|
| 1      | 0.76           | 2 triplets          | 7.4      | ( <i>S,R</i> ) 11.29 and 11.25 ( <i>S,S</i> )   |
| 2      | 1.46           | Overlapping signals |          | ( <i>S,R</i> ) 30.63 and 30.59 ( <i>S,S</i> )   |
| 3      | 2.90           | Overlapping signals |          | ( <i>S,R</i> ) 68.26 and 68.25 ( <i>S,S</i> )   |
| 4      | 1.10           | Overlapping signals |          | ( <i>S,S</i> ) 22.62 and 22.60 ( <i>S,R</i> )   |
| 5      | 7.57           | Overlapping signals |          | ( <i>S,R</i> ) 162.79 and 162.73 ( <i>S,S</i> ) |
| 6a     | 2.23           | Overlapping signals |          | ( <i>S,R</i> ) 42.96 e 42.89 ( <i>S,S</i> )     |
| 6b     | 2.05           | Overlapping signals |          |                                                 |
| 7      | 1.72           | Overlapping signals |          | ( <i>S,S</i> ) 30.97 e 30.91 ( <i>S,R</i> )     |
| 8      | 0.90           | Overlapping signals |          | ( <i>S,R</i> ) 19.77 e 19.67 ( <i>S,S</i> )     |
| 9a     | 1.33           | Overlapping signals |          |                                                 |
| 9b     | 1.19           | Overlapping signals |          | 37.12                                           |
| 10a    | 1.96           | Overlapping signals |          | 25.62                                           |
| 10b    | 1.96           | Overlapping signals |          |                                                 |
| 11     | 5.05           | Overlapping signals |          | 124.65                                          |
| 12     | -              | -                   | -        | 131.61                                          |
| 13     | 1.56           | Overlapping signals |          | 25.89                                           |
| 14     | 1.64           | Overlapping signals |          | 17.83                                           |

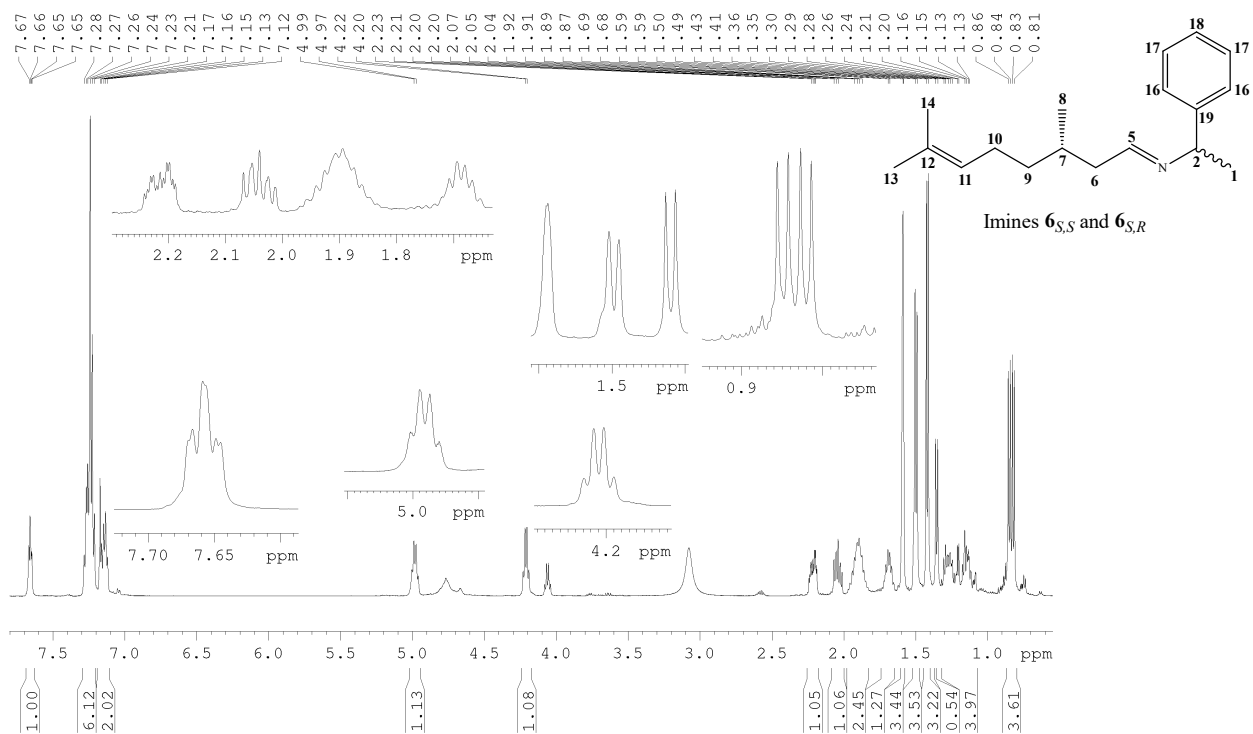

**Figure S4.**  $^1\text{H}$  NMR spectrum of the  $S,S$  and  $S,R$  diastereoisomers derived from the reaction between (*S*)-citronellal and the racemic mixture of methylbenzylamine (imines  $6_{S,S}$  and  $6_{S,R}$ ,  $\text{CDCl}_3$ , 500 MHz).

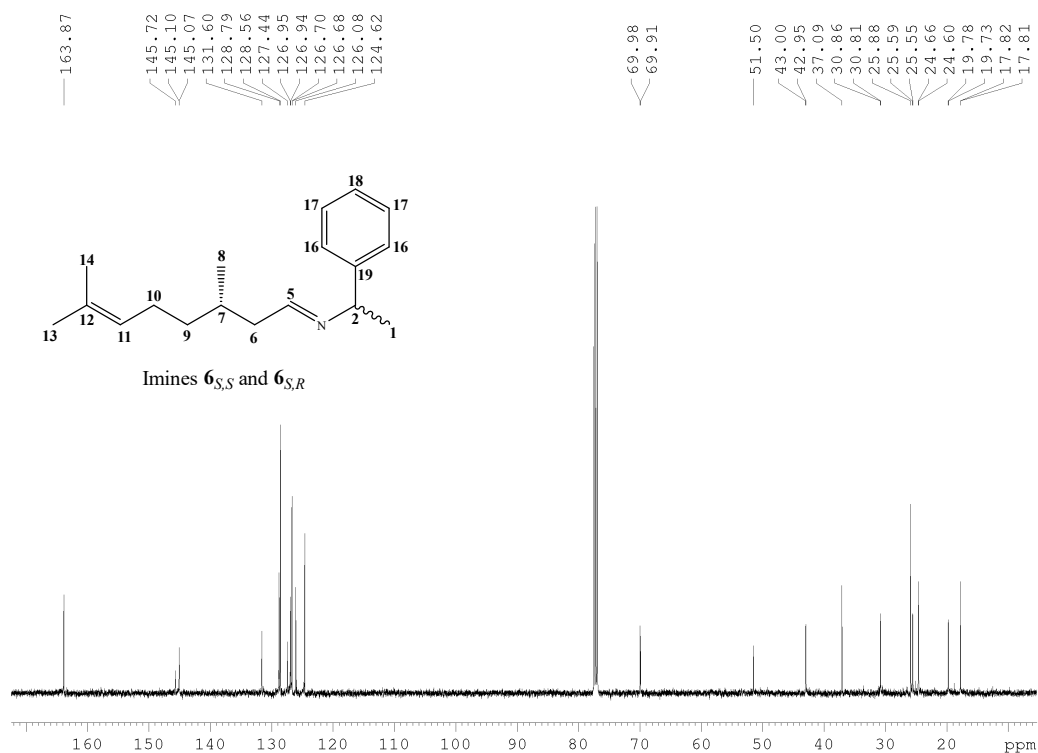

**Figure S5.**  $^{13}\text{C}$  NMR spectrum of the *S,S* and *S,R* diastereoisomers derived from the reaction between (*S*)-citronellal and the racemic mixture of methylbenzylamine (imines **6<sub>S,S</sub>** and **6<sub>S,R</sub>**,  $\text{CDCl}_3$ , 500 MHz).

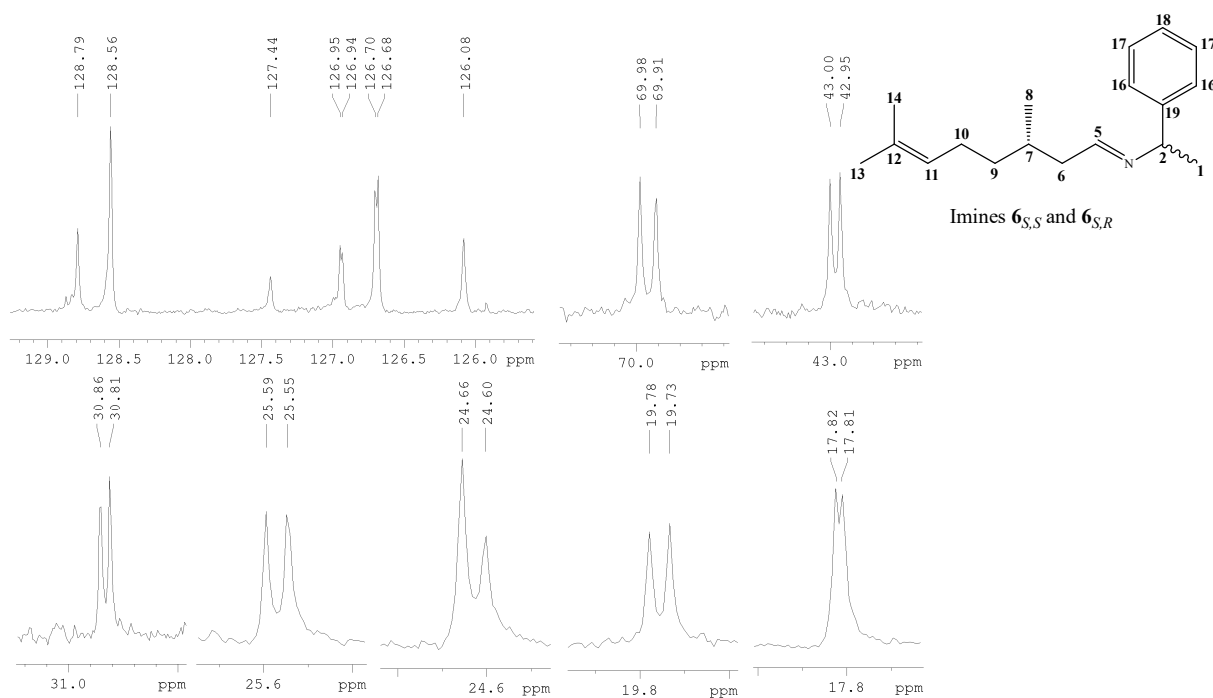

**Figure S6.** Expansions of  $^{13}\text{C}$  NMR spectrum of the *S,S* and *S,R* diastereoisomers derived from the reaction between (*S*)-citronellal and the racemic mixture of methylbenzylamine (imines **6<sub>S,S</sub>** and **6<sub>S,R</sub>**,  $\text{CDCl}_3$ , 500 MHz).

**Table S2.** Spectroscopic data of the *S,S* and *S,R* diastereoisomers derived from the reaction between (*S*)-citronellal and the racemic mixture of methylbenzylamine (imines **6<sub>S,S</sub>** and **6<sub>S,R</sub>**, CDCl<sub>3</sub>, 500 MHz).

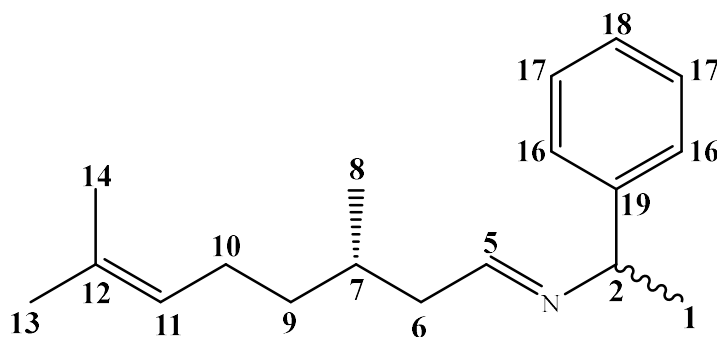

Imines **6<sub>S,S</sub>** and **6<sub>S,R</sub>**

| Number | $\delta_{\text{H}}$ (ppm)            | Multiplicity        | $J$ (Hz) | $\delta_{\text{C}}$ (ppm)                       |
|--------|--------------------------------------|---------------------|----------|-------------------------------------------------|
| 1      | 1.42                                 | 2 doublets          | 6.3      | ( <i>S,R</i> ) 24.66 and 24.60 ( <i>S,S</i> )   |
| 2      | 4.21                                 | Overlapping signals |          | ( <i>S,R</i> ) 69.98 and 69.91 ( <i>S,S</i> )   |
| 5      | 7.66                                 | Overlapping signals |          | 163,87                                          |
| 6a     | 2.21                                 | Overlapping signals |          | ( <i>S,S</i> ) 43.00 and 42.95 ( <i>S,R</i> )   |
| 6b     | 2.04                                 | Overlapping signals |          |                                                 |
| 7      | 1.69                                 | Overlapping signals |          | ( <i>S,S</i> ) 30.86 and 30.81 ( <i>S,R</i> )   |
| 8      | 0.84                                 | 2 doublets          | 6.7      | ( <i>S,S</i> ) 19.78 and 19.73 ( <i>S,R</i> )   |
| 9a     | 1.23                                 | Overlapping signals |          |                                                 |
| 9b     | 1.13                                 | Overlapping signals |          | 37.09                                           |
| 10a    | 1.90                                 | Overlapping signals |          | ( <i>S,S</i> ) 25.59 and 25.55 ( <i>S,R</i> )   |
| 10b    |                                      |                     |          |                                                 |
| 11     | 4.98                                 | Overlapping signals |          | 124.62                                          |
| 12     | -                                    | -                   | -        | 131.60                                          |
| 13     | 1.50                                 | 2 singlets          | -        | 25.88                                           |
| 14     | 1.59                                 | 2 singlets          | -        | 17.82 and 17.81                                 |
| 16     |                                      |                     |          | 126.95 and 126.94                               |
| 17     | Overlapping signals 7.10 to 7.30 ppm |                     |          | 128.56                                          |
| 18     |                                      |                     |          | 126.70 and 126.68                               |
| 19     | -                                    | -                   | -        | ( <i>S,S</i> ) 145.10 and 145.07 ( <i>S,R</i> ) |

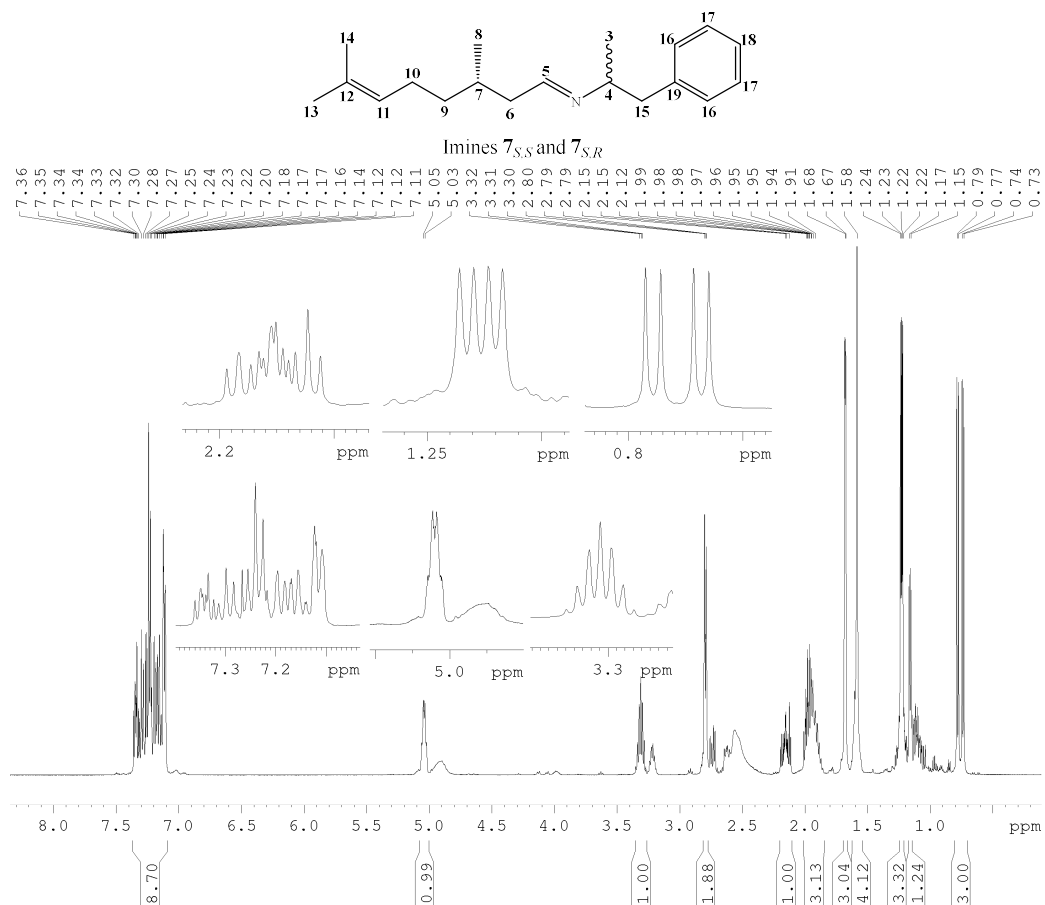

**Figure S7.**  $^1\text{H}$  NMR spectrum of the  $S,S$  and  $S,R$  diastereoisomers derived from the reaction between ( $S$ )-citronellal and the racemic mixture of amphetamine (imines  $7_{S,S}$  and  $7_{S,R}$ ,  $\text{CDCl}_3$ , 500 MHz).



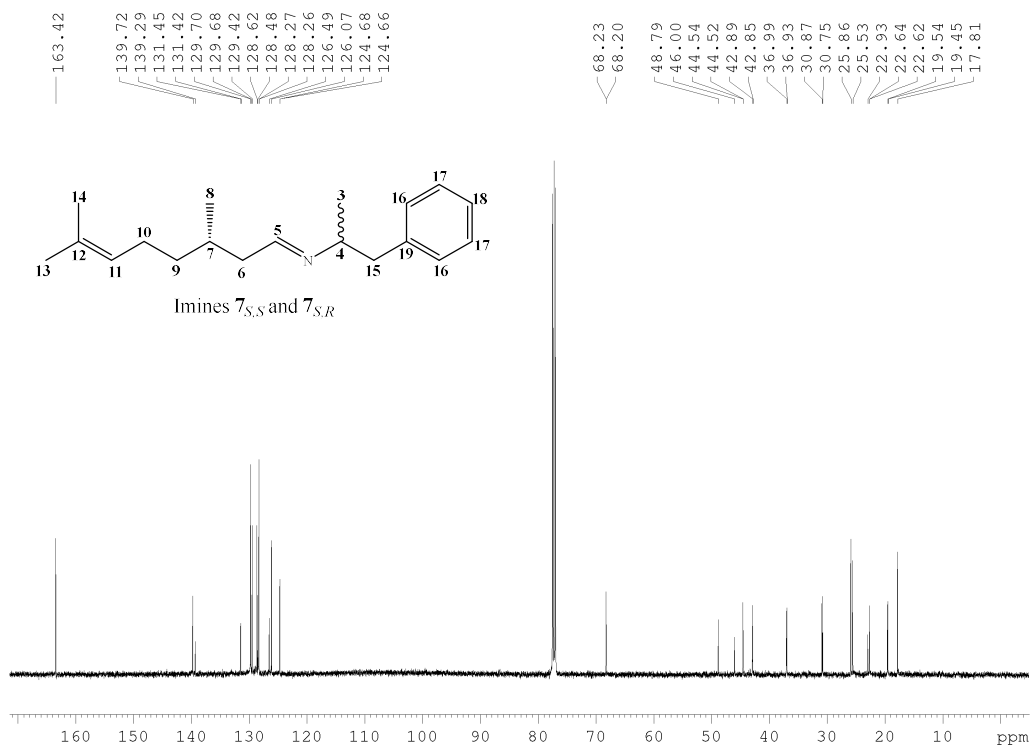

**Figure S8.**  $^{13}\text{C}$  NMR spectrum of the  $S,S$  and  $S,R$  diastereoisomers derived from the reaction between (*S*)-citronellal and the racemic mixture of amphetamine (imines  $7_{S,S}$  and  $7_{S,R}$ ,  $\text{CDCl}_3$ , 500 MHz).

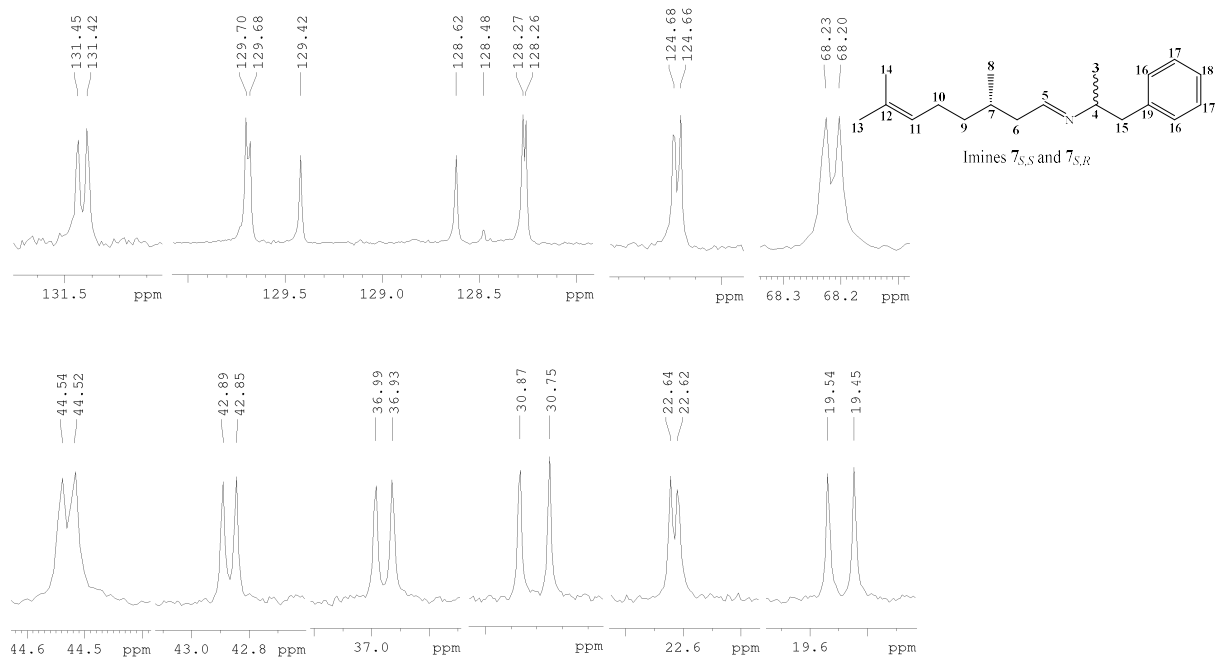

**Figure S9.** Expansions of  $^{13}\text{C}$  NMR spectrum of the  $S,S$  and  $S,R$  diastereoisomers derived from the reaction between (*S*)-citronellal and the racemic mixture of amphetamine (imines  $7_{S,S}$  and  $7_{S,R}$ ,  $\text{CDCl}_3$ , 500 MHz).

**Table S3.** Spectroscopic data of the *S,S* and *S,R* diastereoisomers derived from the reaction between (*S*)-citronellal and the racemic mixture of amphetamine (imines **7<sub>S,S</sub>** and **7<sub>S,R</sub>**, CDCl<sub>3</sub>, 500 MHz).

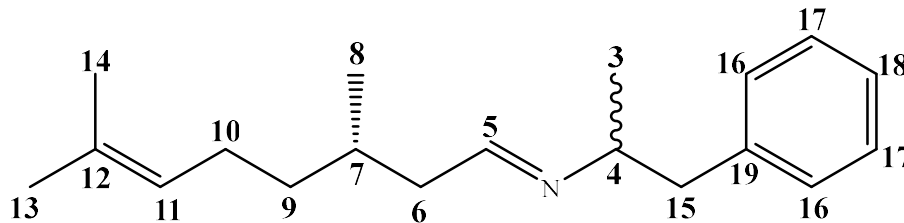

Imines **7<sub>S,S</sub>** and **7<sub>S,R</sub>**

| Number | $\delta_{\text{H}}$ (ppm)          | Multiplicity        | $J$ (Hz) | $\delta_{\text{C}}$ (ppm) |
|--------|------------------------------------|---------------------|----------|---------------------------|
| 3      | 1.22                               | 2 doublets          | 6.3      | 22.64 and 22.62           |
| 4      | 3.28                               | Overlapping signals |          | 68.23 and 68.20           |
| 5      | Overlapping with H16, H17 and H18  |                     |          | 163.42                    |
| 6a     | 2.15                               | Overlapping signals |          | 42.89 and 42.85           |
| 6b     | 1.98                               | Overlapping signals |          |                           |
| 7      | 1.60                               | Overlapping signals |          | 30.87 and 30.75           |
| 8      | 0.75                               | 2 doublets          | 6.6      | 19.54 and 19.45           |
| 9a     | 1.11                               | Overlapping signals |          | 36.99 and 36.93           |
| 9b     | 1.25                               | Overlapping signals |          |                           |
| 10a    | 1.93                               | Overlapping signals |          | 25.53                     |
| 10b    |                                    |                     |          |                           |
| 11     | 5.04                               | Overlapping signals |          | 124.68 and 124.66         |
| 12     | -                                  | -                   | -        | 131.45 and 131.42         |
| 13     | 1.58                               | Overlapping signals |          | 25.86                     |
| 14     | 1.67                               | 2 singlets          | -        | 17.81                     |
| 15a    | 2.79                               | Overlapping signals |          | 44.54 and 44.52           |
| 15b    |                                    |                     |          |                           |
| 16     |                                    |                     |          | 128.27 and 128.26         |
| 17     | Overlapping with H5 7.1 to 7.4 ppm |                     |          | 129.70 and 129.68         |
| 18     |                                    |                     |          | 126.07                    |
| 19     | -                                  | -                   | -        | 139.72                    |

**Table S4.**  $\Delta$ Energy (kcal/mol) and most stable conformers distribution of the diastereoisomer **5** (*S,S* and *S,R*) using B3LYP-D3(BJ)/def2-TZVP(-f) level

| Conformer            | $\Delta$ Energy<br>(kcal/mol) | Conformer           | $\Delta$ Energy (kcal/mol) |
|----------------------|-------------------------------|---------------------|----------------------------|
| 5 <sub>S,S</sub> .1  | 0.00                          | 5 <sub>S,R</sub> .1 | 0.00                       |
| 5 <sub>S,S</sub> .2  | 0.20                          | 5 <sub>S,R</sub> .2 | 0.14                       |
| 5 <sub>S,S</sub> .3  | 0.27                          | 5 <sub>S,R</sub> .3 | 0.16                       |
| 5 <sub>S,S</sub> .4  | 0.38                          | 5 <sub>S,R</sub> .4 | 0.87                       |
| 5 <sub>S,S</sub> .5  | 0.43                          | 5 <sub>S,R</sub> .5 | 0.88                       |
| 5 <sub>S,S</sub> .6  | 0.63                          | 5 <sub>S,R</sub> .6 | 0.92                       |
| 5 <sub>S,S</sub> .7  | 0.88                          | 5 <sub>S,R</sub> .7 | 0.97                       |
| 5 <sub>S,S</sub> .8  | 0.89                          | 5 <sub>S,R</sub> .8 | 1.11                       |
| 5 <sub>S,S</sub> .9  | 1.06                          |                     |                            |
| 5 <sub>S,S</sub> .10 | 1.13                          |                     |                            |
| 5 <sub>S,S</sub> .11 | 1.15                          |                     |                            |
| 5 <sub>S,S</sub> .12 | 1.16                          |                     |                            |
| 5 <sub>S,S</sub> .13 | 1.20                          |                     |                            |
| 5 <sub>S,S</sub> .14 | 1.25                          |                     |                            |
| 5 <sub>S,S</sub> .15 | 1.27                          |                     |                            |
| 5 <sub>S,S</sub> .16 | 1.38                          |                     |                            |
| 5 <sub>S,S</sub> .17 | 1.39                          |                     |                            |
| 5 <sub>S,S</sub> .18 | 1.47                          |                     |                            |
| 5 <sub>S,S</sub> .19 | 1.50                          |                     |                            |
| 5 <sub>S,S</sub> .20 | 1.61                          |                     |                            |
| 5 <sub>S,S</sub> .21 | 1.61                          |                     |                            |
| 5 <sub>S,S</sub> .22 | 1.64                          |                     |                            |
| 5 <sub>S,S</sub> .23 | 1.64                          |                     |                            |
| 5 <sub>S,S</sub> .24 | 1.65                          |                     |                            |
| 5 <sub>S,S</sub> .25 | 1.70                          |                     |                            |
| 5 <sub>S,S</sub> .26 | 1.71                          |                     |                            |
| 5 <sub>S,S</sub> .27 | 1.77                          |                     |                            |
| 5 <sub>S,S</sub> .28 | 1.81                          |                     |                            |

**Table S5.**  $\Delta$ Energy (kcal/mol) and most stable conformers distribution of the diastereoisomer **6** (*S,S* and *S,R*) using B3LYP-D3(BJ)/def2-TZVP(-f) level

| Conformer            | $\Delta$ Energy<br>(kcal/mol) | Conformer           | $\Delta$ Energy<br>(kcal/mol) |
|----------------------|-------------------------------|---------------------|-------------------------------|
| 6 <sub>S,R</sub> .1  | 0.00                          | 6 <sub>S,S</sub> .1 | 0.00                          |
| 6 <sub>S,R</sub> .2  | 0.06                          | 6 <sub>S,S</sub> .2 | 0.68                          |
| 6 <sub>S,R</sub> .3  | 0.12                          | 6 <sub>S,S</sub> .3 | 0.87                          |
| 6 <sub>S,R</sub> .4  | 0.26                          | 6 <sub>S,S</sub> .4 | 1.08                          |
| 6 <sub>S,R</sub> .5  | 0.26                          | 6 <sub>S,S</sub> .5 | 1.10                          |
| 6 <sub>S,R</sub> .6  | 0.59                          | 6 <sub>S,S</sub> .6 | 1.33                          |
| 6 <sub>S,R</sub> .7  | 0.84                          | 6 <sub>S,S</sub> .7 | 1.43                          |
| 6 <sub>S,R</sub> .8  | 0.93                          |                     |                               |
| 6 <sub>S,R</sub> .9  | 0.95                          |                     |                               |
| 6 <sub>S,R</sub> .10 | 0.99                          |                     |                               |
| 6 <sub>S,R</sub> .11 | 1.12                          |                     |                               |
| 6 <sub>S,R</sub> .12 | 1.15                          |                     |                               |
| 6 <sub>S,R</sub> .13 | 1.15                          |                     |                               |
| 6 <sub>S,R</sub> .14 | 1.26                          |                     |                               |
| 6 <sub>S,R</sub> .15 | 1.29                          |                     |                               |
| 6 <sub>S,R</sub> .16 | 1.34                          |                     |                               |
| 6 <sub>S,R</sub> .17 | 1.40                          |                     |                               |
| 6 <sub>S,R</sub> .18 | 1.41                          |                     |                               |
| 6 <sub>S,R</sub> .19 | 1.41                          |                     |                               |
| 6 <sub>S,R</sub> .20 | 1.50                          |                     |                               |

**Table S6.**  $\Delta$ Energy (kcal/mol) and most stable conformers distribution of the diastereoisomer **7** (*S,S* and *S,R*) using B3LYP-D3(BJ)/def2-TZVP(-f) level

| Conformer           | $\Delta$ Energy<br>(kcal/mol) | Conformer           | $\Delta$ Energy<br>(kcal/mol) |
|---------------------|-------------------------------|---------------------|-------------------------------|
| 7 <sub>S,S</sub> .1 | 0.00                          | 7 <sub>S,R</sub> .1 | 0.00                          |
| 7 <sub>S,S</sub> .2 | 0.00                          | 7 <sub>S,R</sub> .2 | 0.77                          |
| 7 <sub>S,S</sub> .3 | 0.59                          |                     |                               |
| 7 <sub>S,S</sub> .4 | 0.80                          |                     |                               |
| 7 <sub>S,S</sub> .5 | 0.91                          |                     |                               |
| 7 <sub>S,S</sub> .6 | 0.92                          |                     |                               |
| 7 <sub>S,S</sub> .7 | 1.02                          |                     |                               |
| 7 <sub>S,S</sub> .8 | 1.10                          |                     |                               |

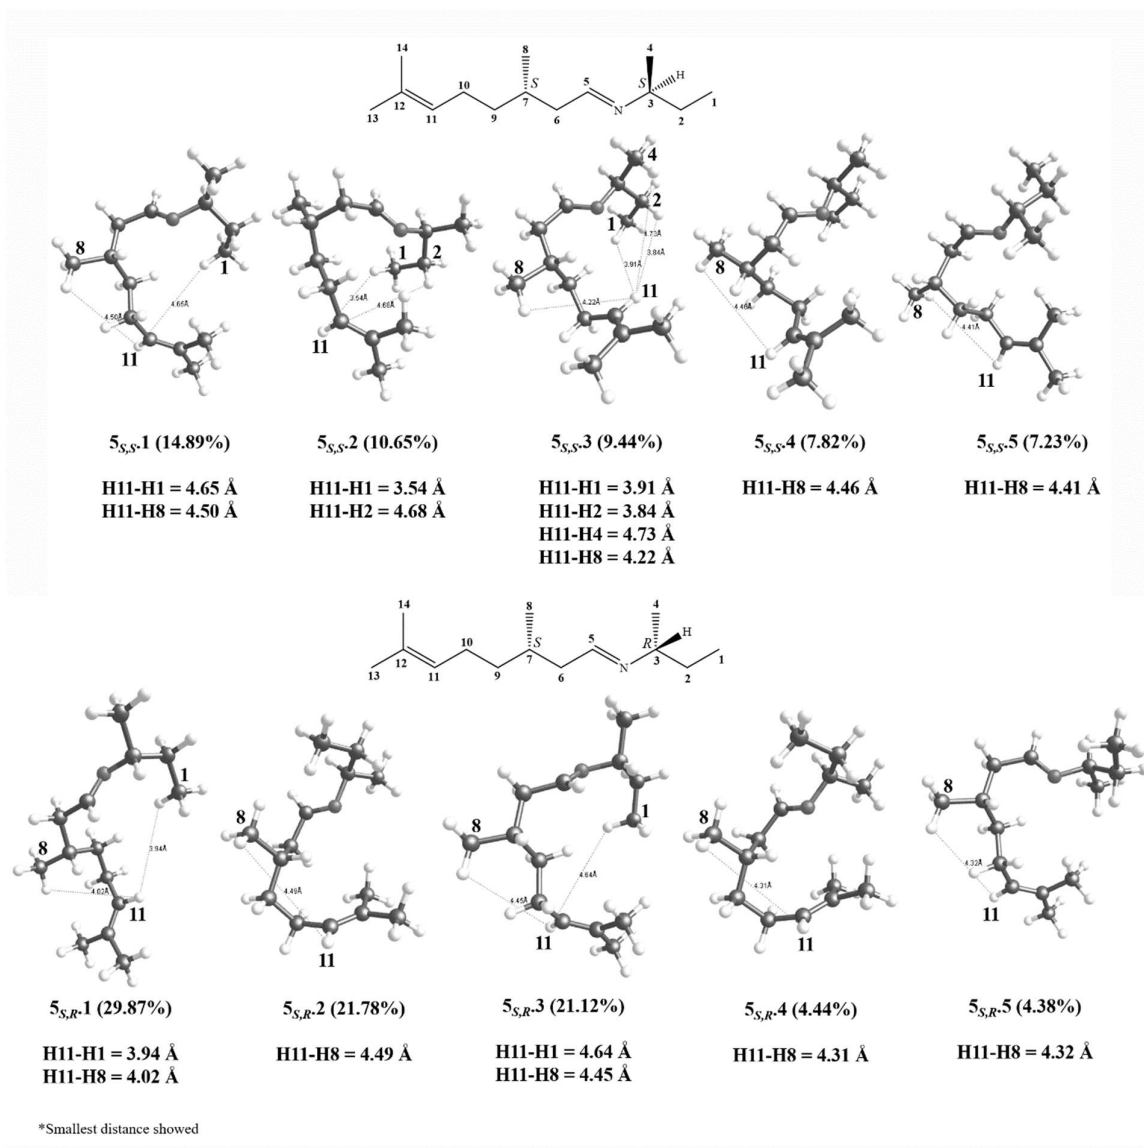

**Figure S10.** Five most stable conformers distribution of the diastereoisomer **5** (*S,S* and *S,R*) using B3LYP-D3(BJ)/def2-TZVP(-f) level. In parentheses is the percentage of Boltzmann's population. Just below each conformer, there is the distance, less than 5 Å, between the hydrogens.

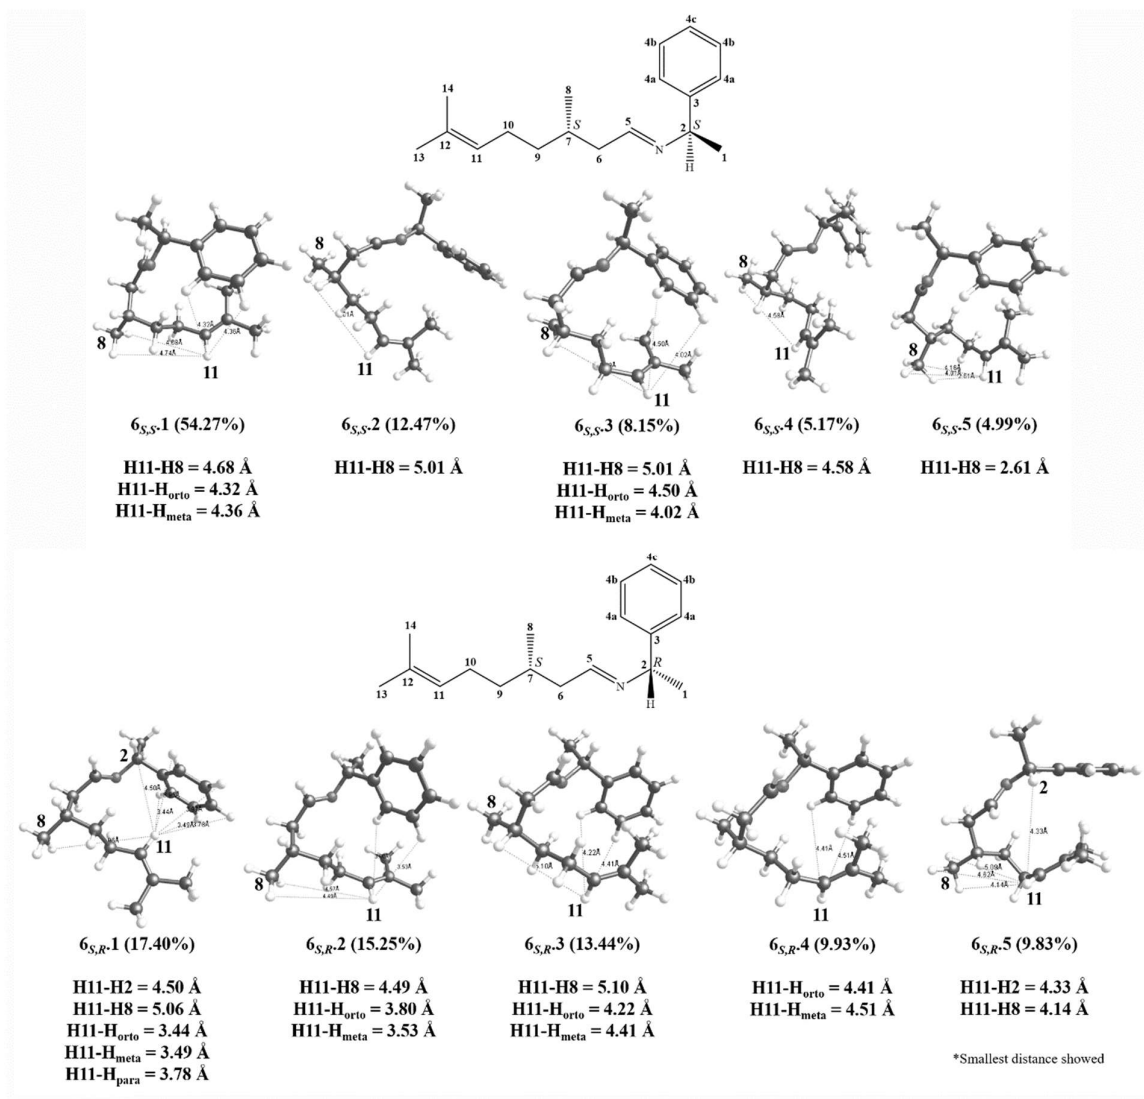

**Figure S11.** Five most stable conformers distribution of the diastereomer **6** (*S,S* and *S,R*) using B3LYP-D3(BJ)/def2-TZVP(-f) level. In parentheses is the percentage of Boltzmann's population. Just below each conformer, there is the distance, less than 5 Å, between the hydrogens.

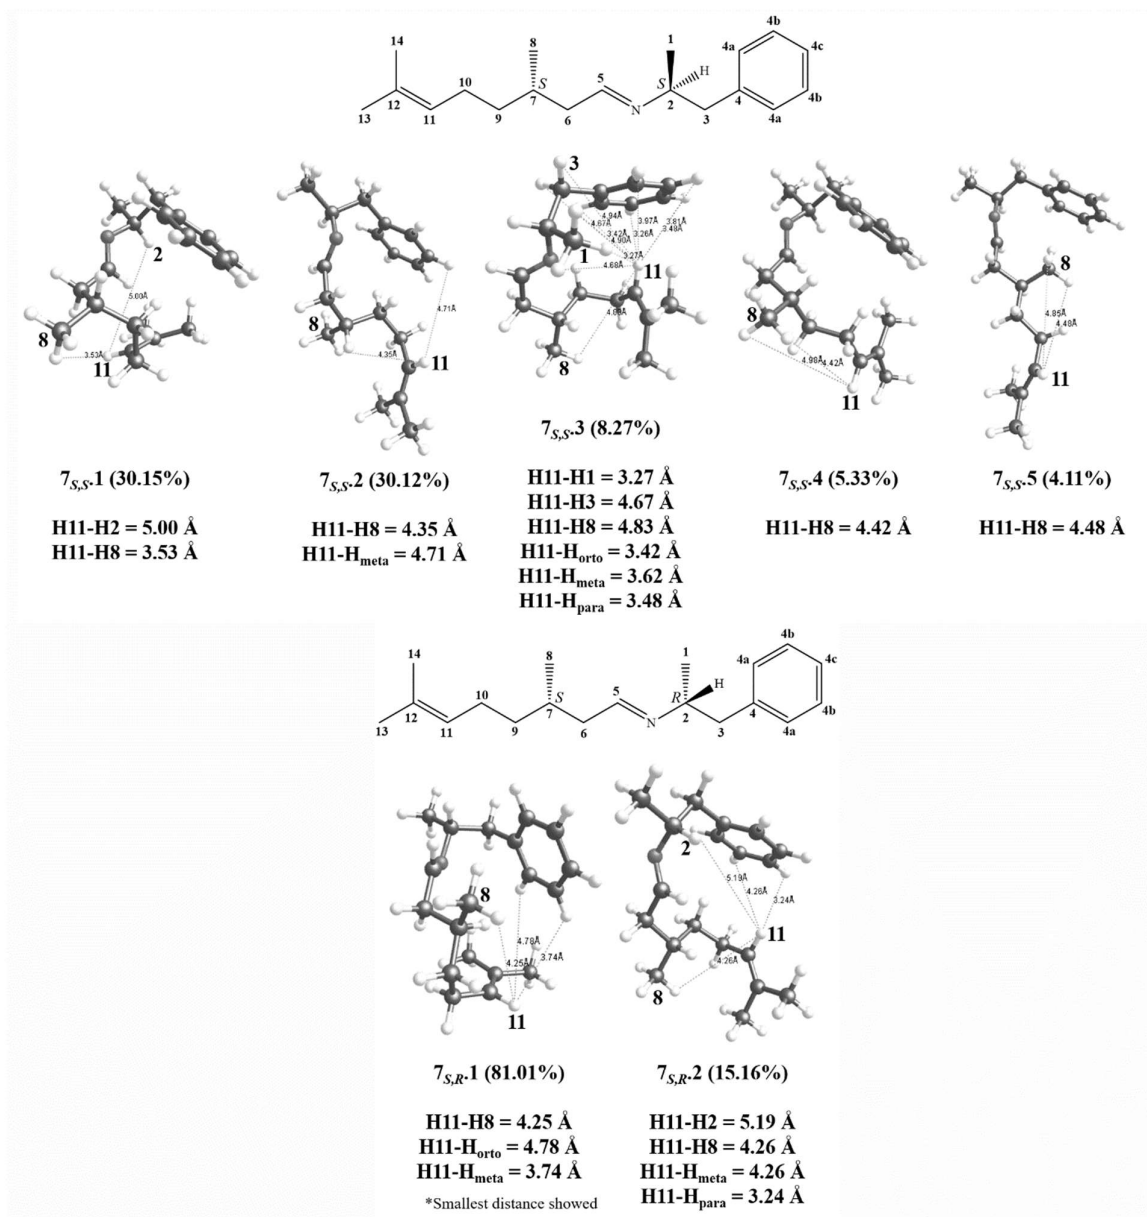

**Figure S12.** Five most stable conformers distribution of the diastereoisomer **7** (*S,S* and *S,R*) using B3LYP-D3(BJ)/def2-TZVP(-f) level. In parentheses is the percentage of Boltzmann's population. Just below each conformer, there is the distance, less than 5 Å, between the hydrogens.

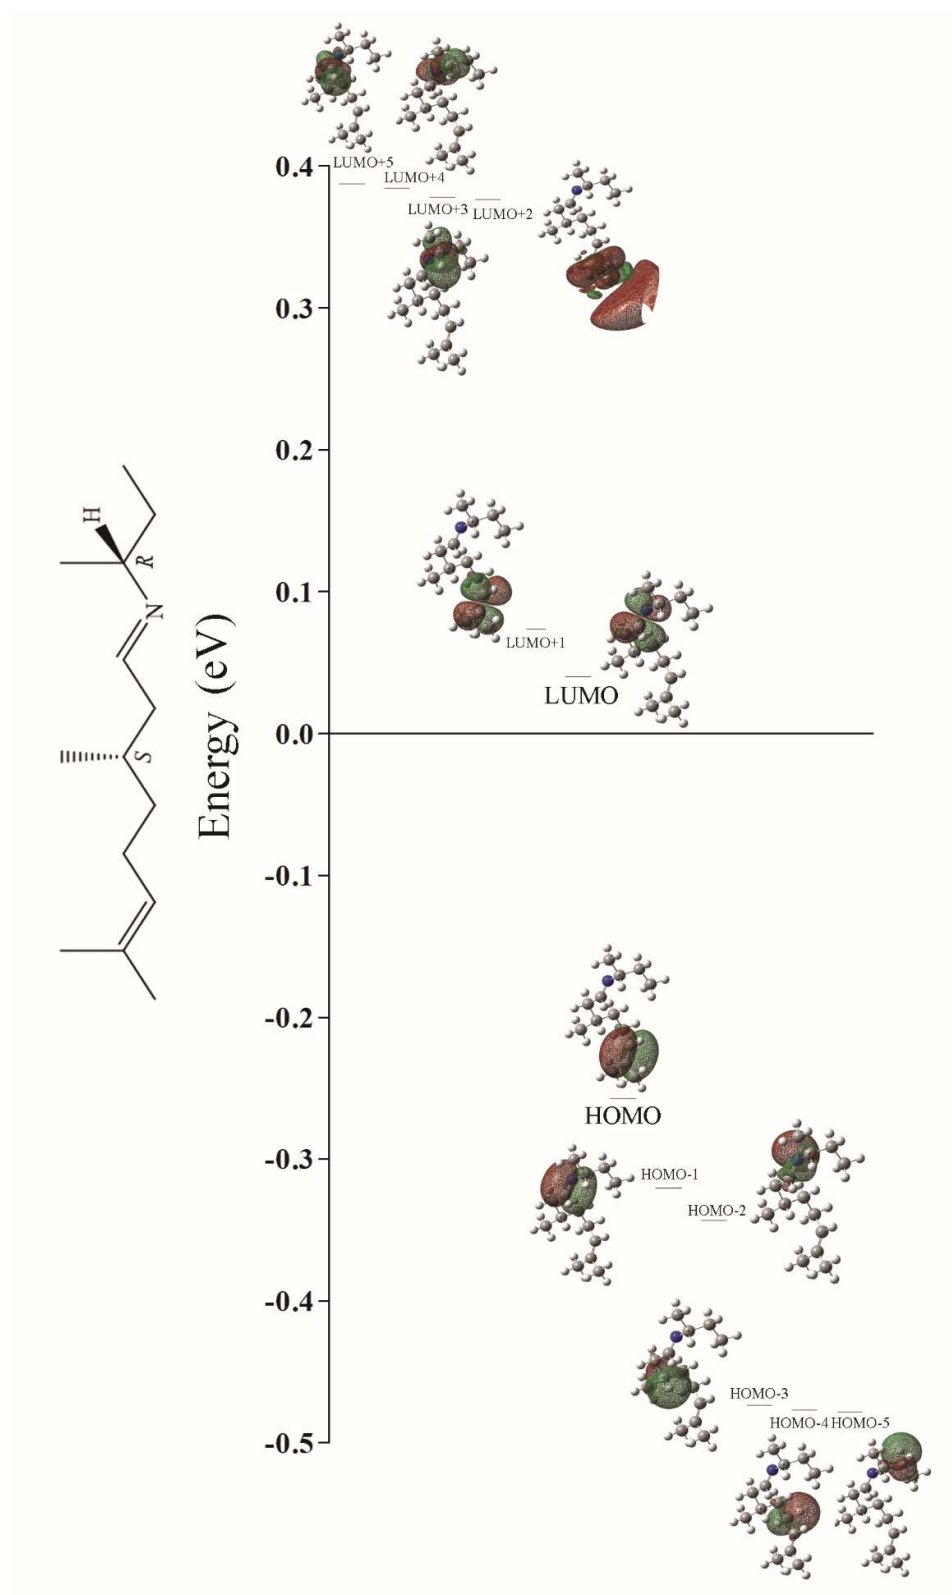

**Figure S13.** Energy diagram of the molecular orbitals of the diastereomeric imine  $5_{S,R}$ .



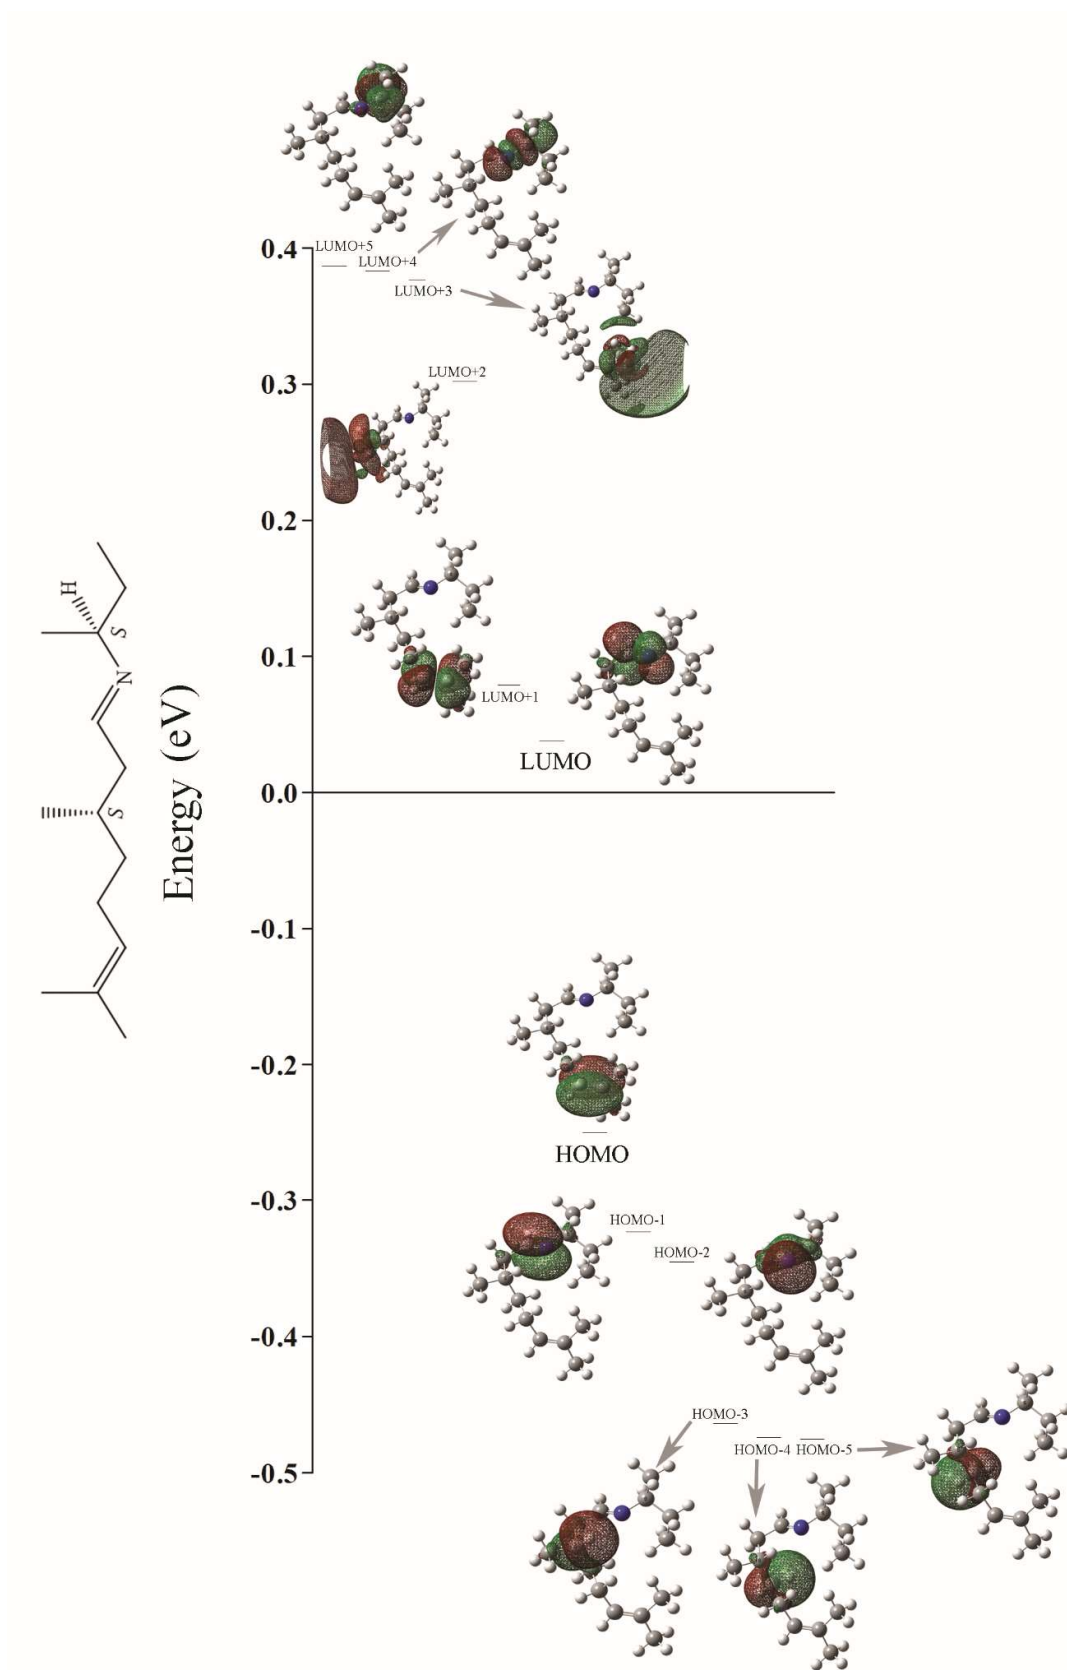

**Figure S14.** Energy diagram of the molecular orbitals of the diastereomeric imine **5<sub>s,s</sub>**.

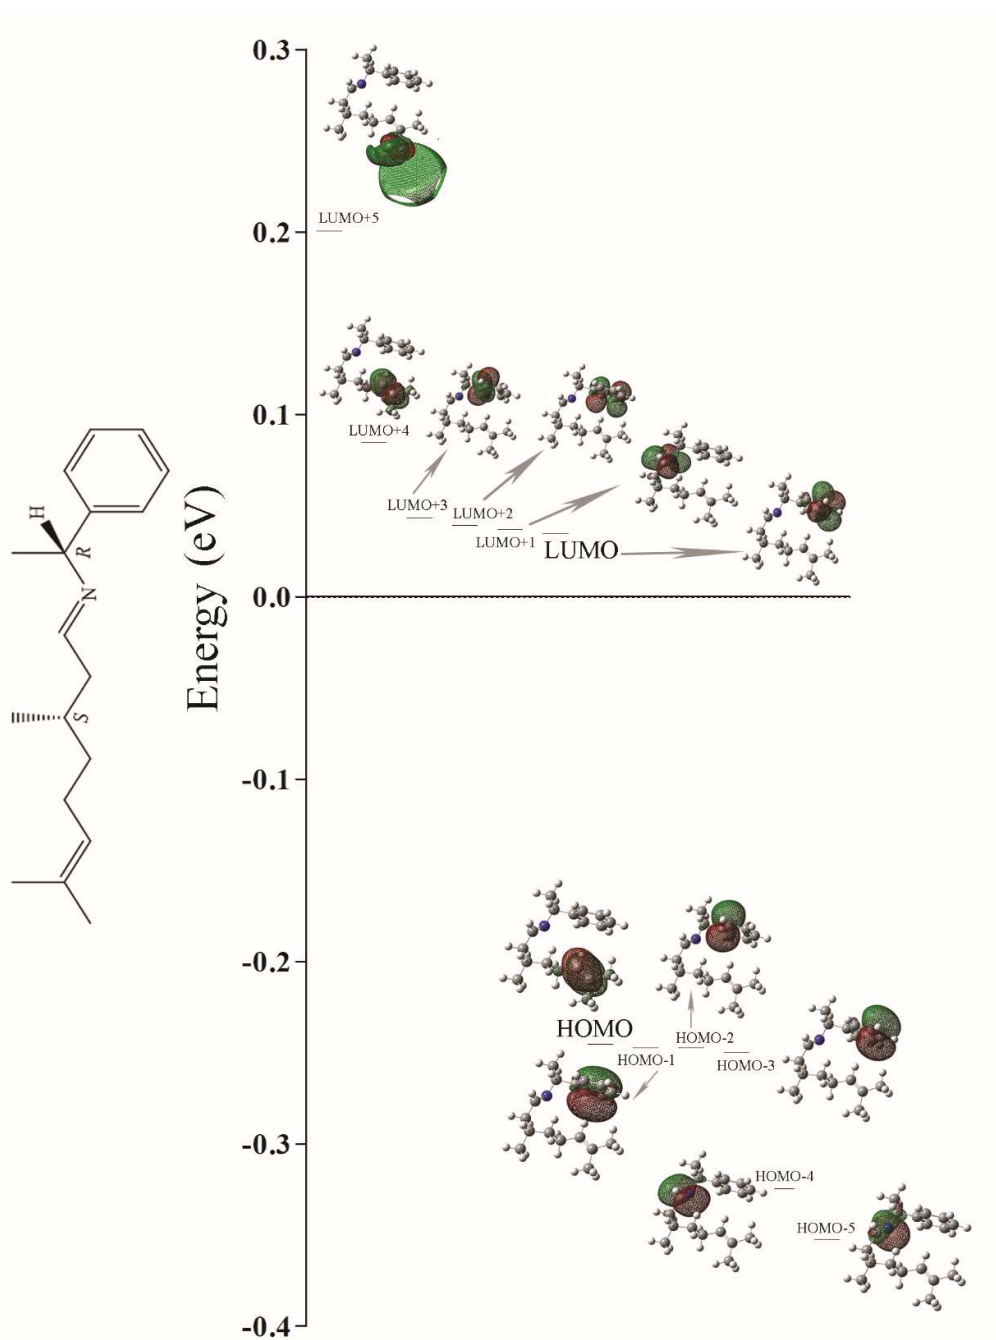

**Figure S15.** Energy diagram of the molecular orbitals of the diastereomeric imine  $6_{S,R}$ .

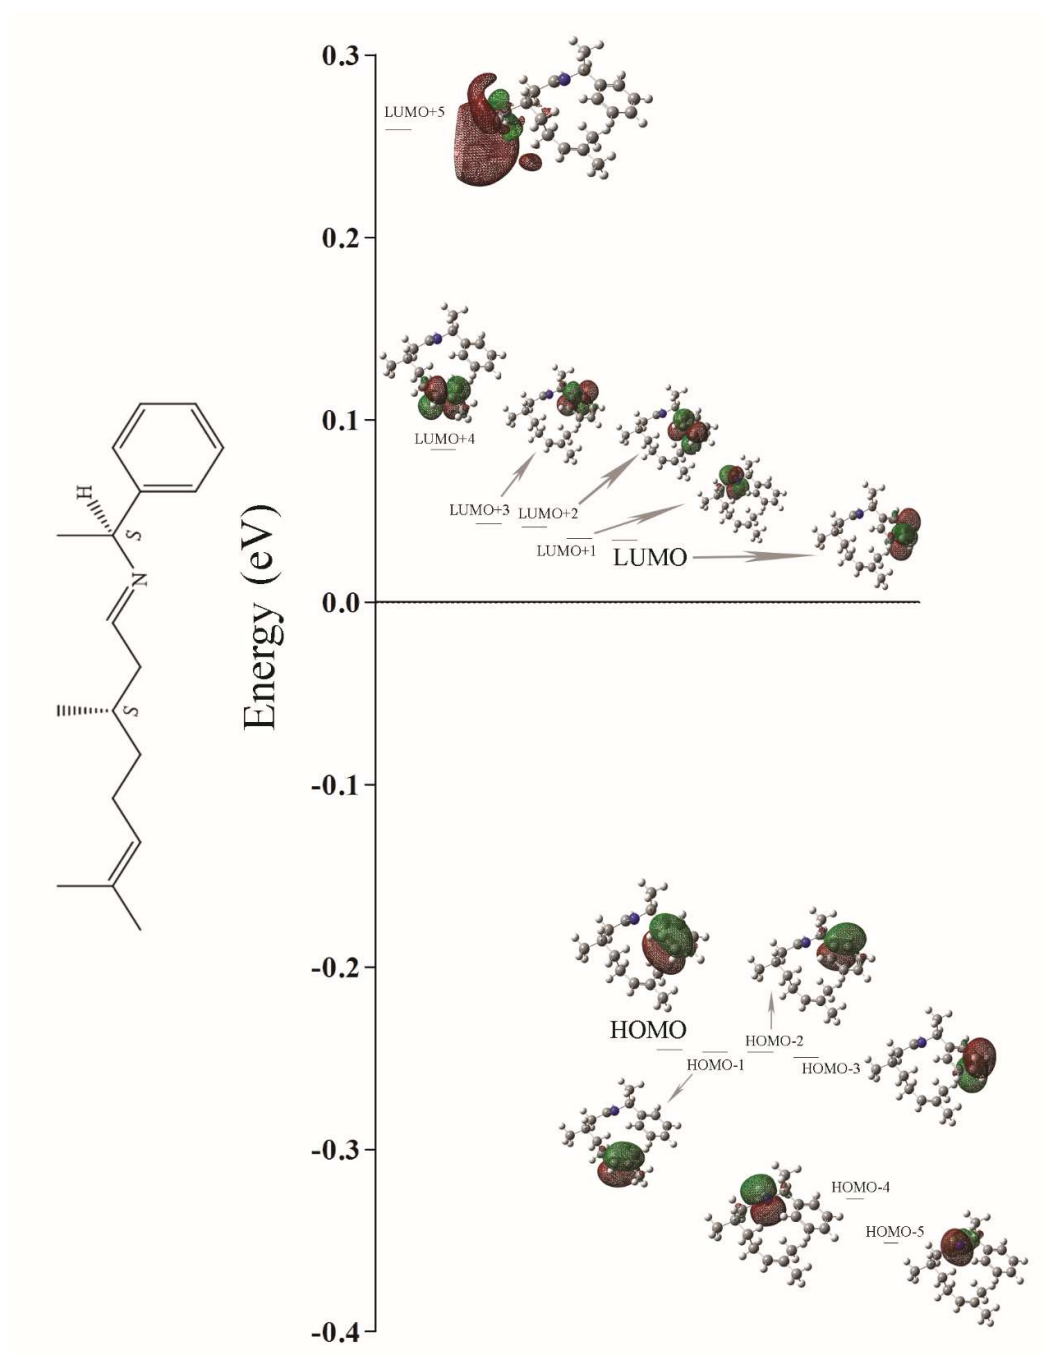

**Figure S16.** Energy diagram of the molecular orbitals of the diastereomeric imine **6<sub>s,s</sub>**.

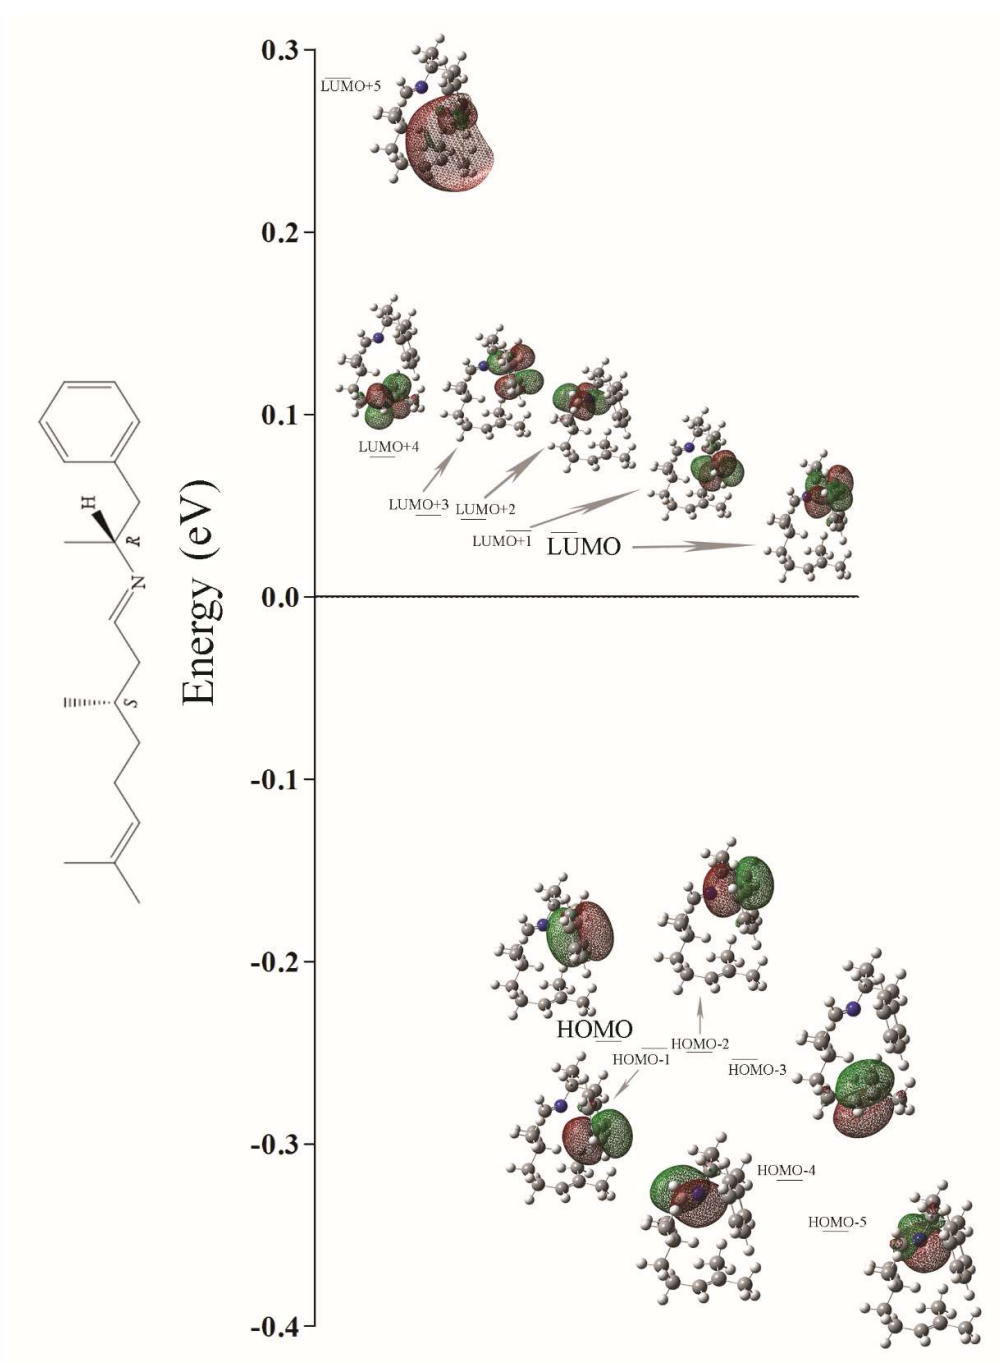

**Figure S17.** Energy diagram of the molecular orbitals of the diastereomeric imine **7**<sub>S,R</sub>.

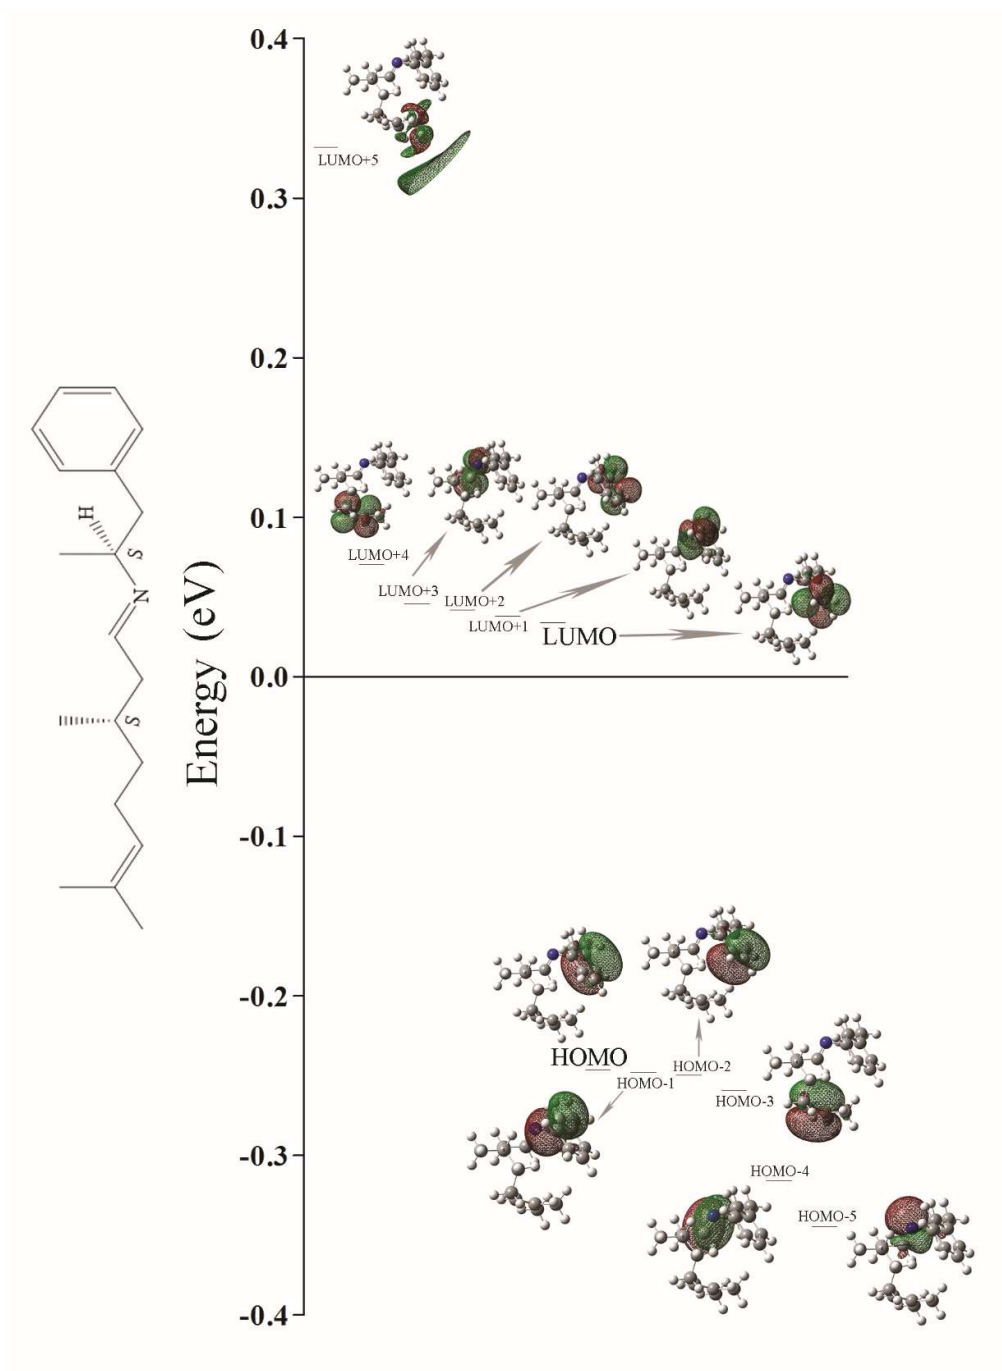

**Figure S18.** Energy diagram of the molecular orbitals of the diastereomeric imine **7<sub>S,S</sub>**.
